# Supplementary material for: Enhanced ANGPTL2 expression in adipose tissues and its association with insulin resistance in obese women
Source: PubMed Central journal article supplement (PMC6143523; doi:10.1038/s41598-018-32419-w), 2018-09-18
Supplement: 41598_2018_32419_MOESM1_ESM.pdf [file 41598_2018_32419_MOESM1_ESM.pdf]

**Enhanced ANGPTL2 expression in adipose tissues  
and its association with insulin resistance in obese women**

Jimin Kim<sup>1</sup>, Seul Ki Lee<sup>1</sup>, Yeon Jin Jang<sup>1\*</sup>, Hye Soon Park<sup>2\*</sup>, Jong-Hyeok Kim<sup>3</sup>, Joon Pio  
Hong<sup>4</sup>, Yeon Ji Lee<sup>5</sup>, Yoon-Suk Heo<sup>6</sup>

<sup>1</sup>Department of Physiology, Cell Dysfunction Research Center, University of Ulsan College of Medicine, Seoul, Korea

<sup>2</sup>Department of Family Medicine, University of Ulsan College of Medicine, Seoul, Korea

<sup>3</sup>Department of Obstetrics and Gynecology, University of Ulsan College of Medicine, Seoul, Korea

<sup>4</sup>Department of Plastic Surgery, University of Ulsan College of Medicine, Seoul, Korea

<sup>5</sup>Department of Family Medicine, Inha University, College of Medicine, Incheon, Korea

<sup>6</sup>Department of General Surgery, Inha University, College of Medicine, Incheon, Korea

|                                       | Normal weight | Obesity | Obesity<br>with diabetes |
|---------------------------------------|---------------|---------|--------------------------|
| <i>n</i>                              | 32            | 32      | 13                       |
| <i>Menopause</i>                      |               | 2       | 3                        |
| <i>Gynecological surgery patients</i> | 32            | 4       |                          |
| Myoma                                 | 21            | 1       |                          |
| Leiomyoma                             | 4             |         |                          |
| Teratoma                              |               |         |                          |
| Cystadenoma                           |               |         |                          |
| Others                                | 7             | 3       |                          |
| <i>Duration of diabetes</i>           |               |         |                          |
| <1 yr                                 |               |         | 4                        |
| 2–9 yr                                |               |         | 3                        |
| ≥10 yr                                |               |         | 6                        |
| <i>Receiving treatment</i>            |               |         |                          |
| Hypertension                          |               |         |                          |
| Beta-adrenergic receptor blocker      |               |         | 3                        |
| Angiotensin receptor blocker          |               | 2       | 9                        |
| Calcium channel blocker               |               | 1       | 3                        |
| Diuretics                             |               | 2       | 3                        |
| Diabetes                              |               |         |                          |
| Metformin                             |               |         | 8                        |
| Sulfonylurea                          |               |         | 3                        |
| Insulin                               |               |         | 4                        |
| Glucosidase inhibitor                 |               |         | 2                        |
| Dyslipidemia                          |               |         |                          |
| Statins                               |               |         | 3                        |

**Table S1. Clinical characteristics of the non-diabetic obese, obese type 2 diabetic, and normal weight control groups (numbers of patients are shown).**

|                           | Before       | After       | <i>p</i> value |
|---------------------------|--------------|-------------|----------------|
| BMI (kg/m <sup>2</sup> )  | 38.1 ± 1.4   | 28.6 ± 1.0  | <0.001         |
| Body weight (kg)          | 106.0 ± 4.9  | 79.4 ± 3.1  | <0.001         |
| Systolic BP (mmHg)        | 138.7 ± 3.2  | 118.7 ± 2.8 | <0.001         |
| Diastolic BP (mmHg)       | 83.7 ± 1.8   | 74.5 ± 2.5  | 0.009          |
| Glucose (mg/dL)           | 153.1 ± 15.5 | 104.0 ± 5.4 | 0.003          |
| Insulin (μU/mL)           | 26.9 ± 4.0   | 8.17 ± 0.79 | <0.001         |
| HOMA-IR                   | 10.4 ± 2.0   | 2.05 ± 0.18 | <0.001         |
| Total cholesterol (mg/dL) | 186.4 ± 9.5  | 156.0 ± 7.1 | 0.006          |
| HDL-cholesterol (mg/dL)   | 42.7 ± 1.8   | 45.0 ± 1.8  | 0.200          |
| LDL-cholesterol (mg/dL)   | 114.7 ± 7.0  | 90.0 ± 5.9  | 0.013          |
| Triglyceride (mg/dL)      | 231.7 ± 45.5 | 99.4 ± 12.3 | 0.005          |
| HbA1c (%)                 | 7.35 ± 0.44  | 5.71 ± 0.18 | <0.001         |
| hs-CRP (mg/dL)            | 0.61 ± 0.12  | 0.23 ± 0.08 | 0.002          |
| Leptin (ng/mL)            | 28.9 ± 4.4   | 7.49 ± 1.53 | <0.001         |
| Adiponectin (μg/mL)       | 3.70 ± 0.76  | 9.07 ± 1.17 | <0.001         |
| IL-34 (pg/mL)             | 0.21 ± 0.02  | 0.11 ± 0.02 | <0.001         |

**Table S2. Obesity index and metabolic parameters measured before and after RYGB surgery in obese subjects.** *n* = 23 female patients. Data are shown as the mean ± SE; *P* values were calculated using Student's paired *t*-test. Metabolic parameters were measured before and 5–9 months (average, 7.3 months) after laparoscopic Roux-en-Y gastric bypass (RYGB) surgery.

| Gene                 | Forward primer (5'-3')        | Reverse primer (5'-3')        |
|----------------------|-------------------------------|-------------------------------|
| ANGPTL2              | GCTGGACCGTCATCCAGA<br>GA      | TGCCGTTGTGCCATGTAAAG          |
| ANGPTL2 <sup>a</sup> | TGCCATTTGTGTCAACTCC<br>AA     | CACGATGCCTCCGTCTACCT          |
| Adiponectin          | GGGTGAGAAAGGAGATCC<br>AGGTCTT | AGCGAATGGGCATGTTGGGG<br>A     |
| Leptin               | GACATTTACACACGCAG<br>TCAG     | TAGACTGCCAGTGTCTGGTC          |
| TNF- $\alpha$        | GAGCTGAACAATAGGCTG<br>TTCCCA  | AGAGGCTCAGCAATGAGTGA<br>CAGT  |
| TNF- $\alpha^a$      | TTCATGCACCACCATCAA<br>GGACT   | TGACCACTCTCCCTTTGCAGA<br>ACT  |
| IL-1 $\beta$         | ACAGCTGGAGAGTGTAGA<br>TCC     | CTTGAGAGGTGCTGATGTACC         |
| IL-1 $\beta^a$       | AACCTGCTGGTGTGTGAC<br>GTTC    | CAGCACGAGGCTTTTTTTGTTG<br>T   |
| CD68                 | CTACATGGCGGTGGAGTA<br>CAA     | ATGATGAGAGGCAGCAAGAT<br>GG    |
| CHOP                 | AGGGAGAACCAGGAAAC<br>GGAAACA  | TCCTGCTTGAGCCGTTTCATTC<br>TCT |
| TRIB3                | GACCGTGAGAGGAAGAA<br>GCTGG    | TGCCTTGCCCGAGTATGAGG          |
| MMP9                 | TGGGCTACGTGACCTATGA<br>CAT    | GCCAGCCCACCTCCACTCCT<br>C     |
| MMP9 <sup>a</sup>    | AAGGCAGCGTTAGCCAGA<br>A       | GGAAGACCACAAAAGTCGGC          |
| $\beta$ -actin       | GACGGGGTCACCCACAC             | GTGGTGGTGAAGCTGTAGCC          |
| 36B4                 | CCTGAGTGATCTGCAGCT<br>G       | CACCTGCTGGATGACCAGC           |

**Table S3. Primer sequences used for real-time qPCR analyses.** <sup>a</sup> = mouse primer sequences.

(a)

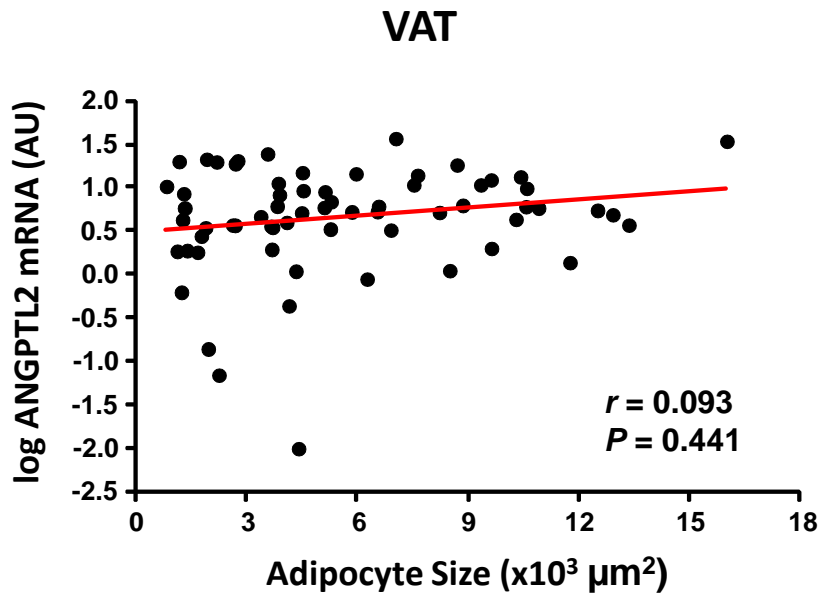

(b)

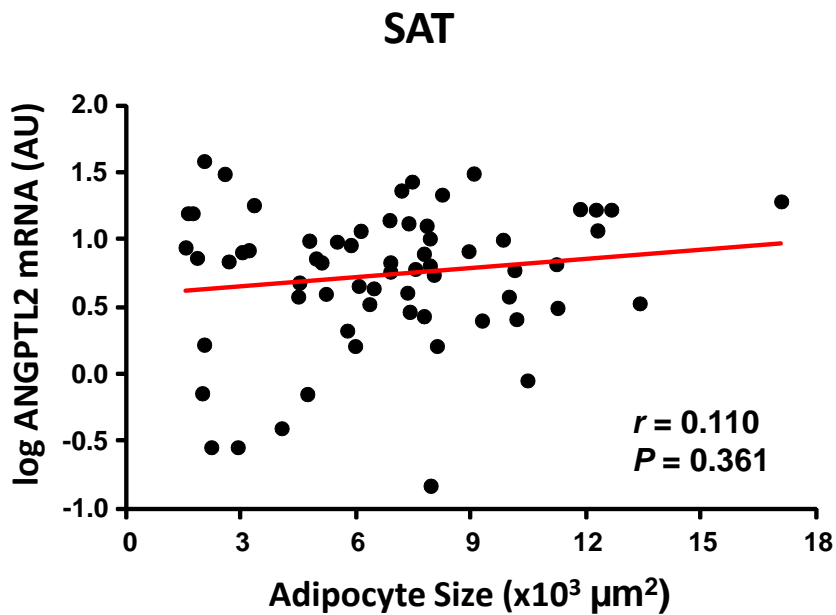

**Figure S1. No association between adipose tissue ANGPTL2 mRNA expression and adipocyte size.** (a & b)  $n = 70$ . The correlation coefficient ( $r$ ) between changes in measurements was calculated using Spearman's correlation. ANGPTL2 mRNA was log-transformed for statistical analysis and presented in arbitrary units (AU).

**(a)**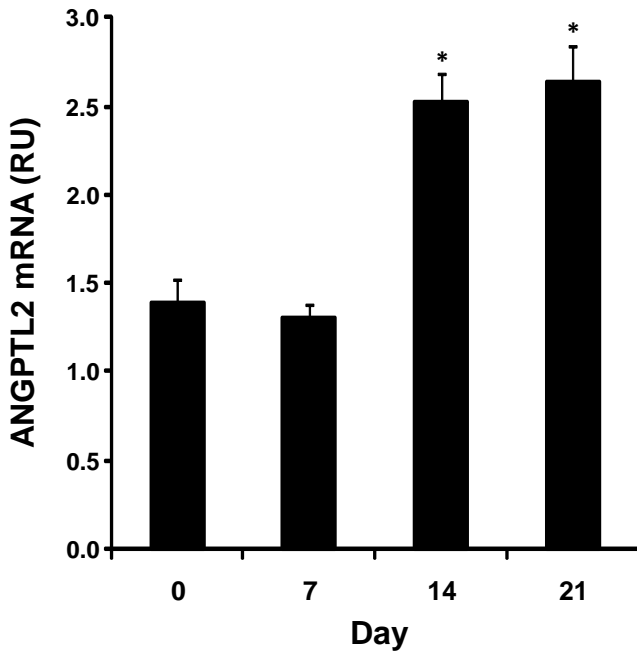**(b)**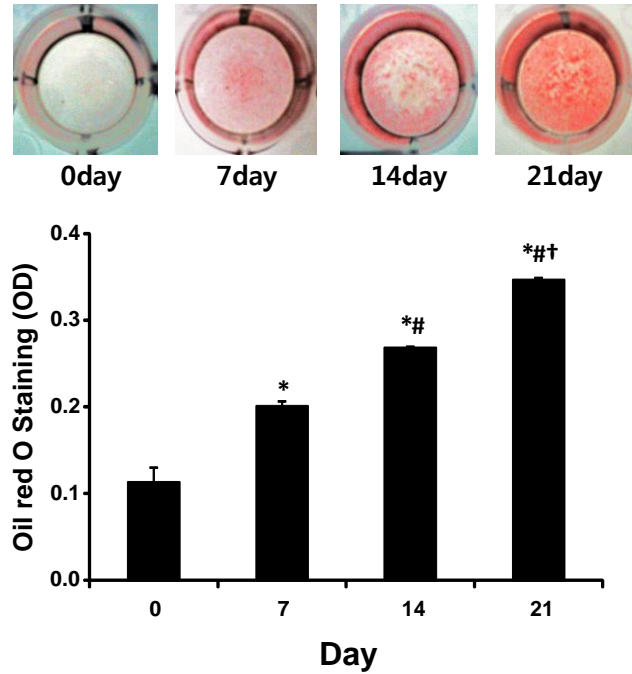

**Figure S2. Induction of ANGPTL2 mRNA during adipogenesis.** (a) 3T3-L1 preadipocytes were induced to differentiate to adipocytes and maintained up to 21 days. ANGPTL2 mRNA was measured using qPCR ( $n = 3$ ). 36B4 was used as the reference gene. ANGPTL2 mRNA levels are presented in relative units (RU). \* $p < 0.01$  vs. the day 0 preadipocytes by ANOVA with Tukey test. (b) Accumulation of triglyceride in 3T3-L1 adipocytes. Triglyceride accumulation was visualized by Oil red-O staining and its intensity was determined using a microplate reader ( $n = 6$ ). \* $p < 0.01$  vs. the day 0 preadipocytes; # $p < 0.01$  vs. the day 7 adipocytes; † $p < 0.01$  vs. the day 14 adipocytes by ANOVA with Tukey test.

**(a)** **3T3-L1 Adipocytes**

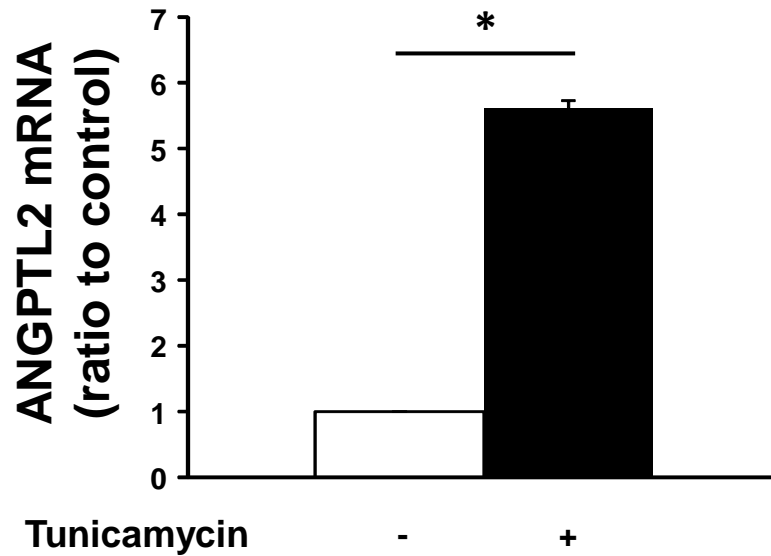

**(b)** **RAW264.7 Macrophages**

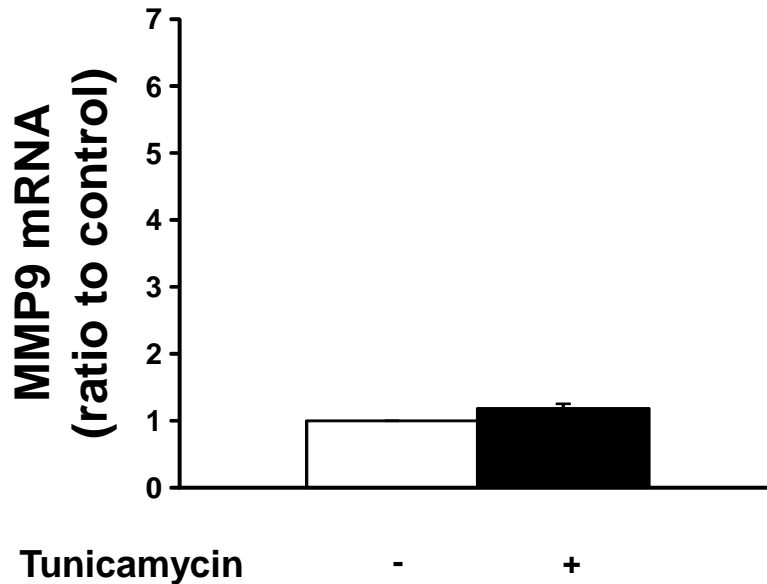

**Figure S3. Induction of ANGPTL2 mRNA, but not MMP9 mRNA by tunicamycin.** (a & b) Differentiated 3T3-L1 adipocytes and RAW264.7 macrophages were stimulated to tunicamycin (2  $\mu\text{g}/\text{mL}$ ). ANGPTL2 mRNA in adipocytes (a) and MMP9 mRNA in macrophages (b) were measured using qPCR (n = 3). \* $p < 0.01$  vs. the cells without treatment of tunicamycin by paired  $t$ -test.

## RAW264.7 Macrophages

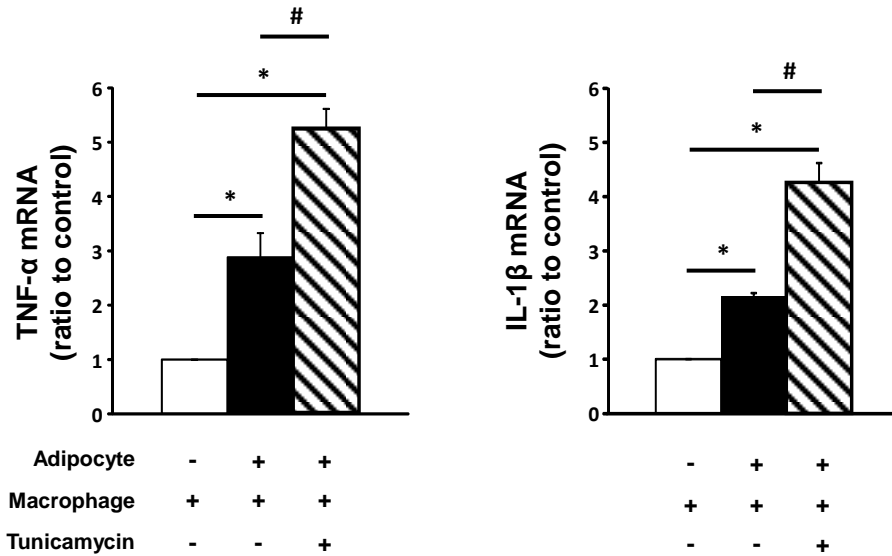

**Figure S4. Induction of TNF- $\alpha$  and IL-1 $\beta$  mRNA expression by co-culture of adipocytes and macrophages.** RAW264.7 macrophages were co-cultured for 24 hours with differentiated 3T3-L1 adipocytes in the presence or absence of with tunicamycin (2  $\mu$ g/mL) as described in Fig. 2 legend. Measurement of TNF- $\alpha$  mRNA expression (left panel) and IL-1 $\beta$  mRNA expression (right panel) in macrophages was performed by qPCR (n = 3). \* $p$  < 0.05 vs. macrophages alone, # $p$  < 0.05 vs. co-cultured macrophages. The data were analyzed by ANOVA with Tukey test.



## RAW264.7 Macrophages

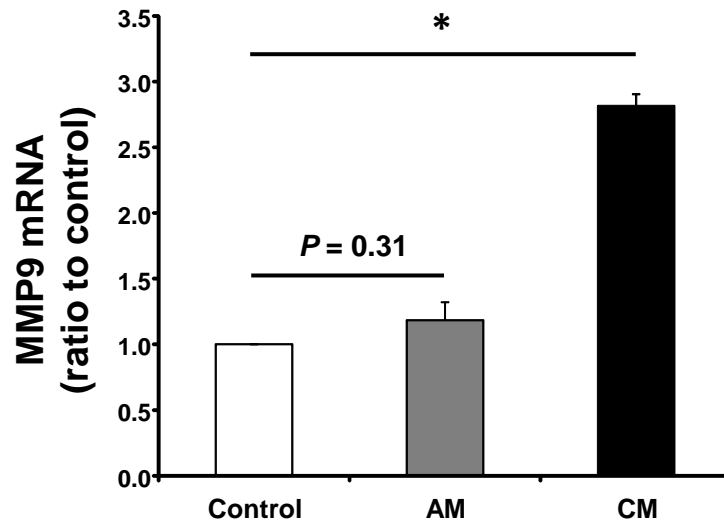

**Figure S5. Effects of adipocyte-conditioned media on MMP9 mRNA expression in RAW264.7 macrophages.** Adipocyte-conditioned media (CM) was prepared by collecting the supernatant from the 3T3-L1 adipocytes cultured for 24 hours in the presence of 2  $\mu\text{g}/\text{mL}$  tunicamycin. RAW264.7 macrophages were incubated for 16 hours in DMEM supplemented with or without (Control) 80% CM or 80% adipocyte media (AM: supernatant from the 3T3-L1 adipocytes cultured without tunicamycin). (n = 3). \* $p < 0.05$  vs. Control

**(a)**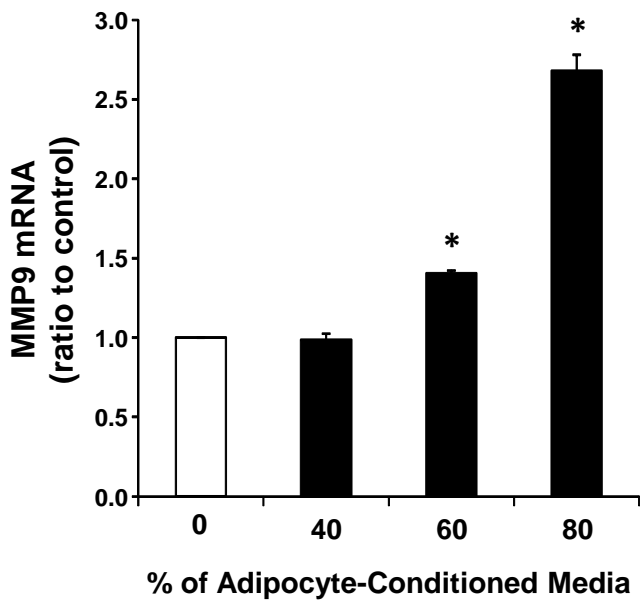**(b)**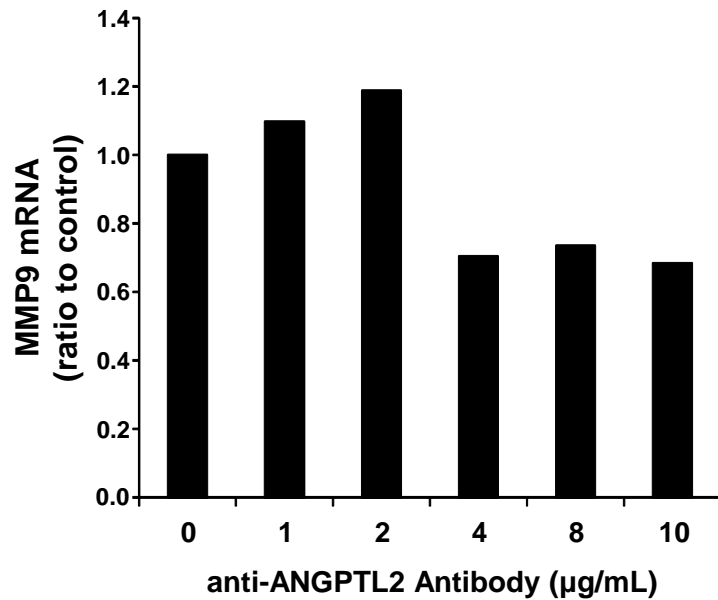

**Figure S6. Induction of MMP9 mRNA in RAW264.7 macrophages.** (a) Effects of adipocyte-conditioned media (adipocyte-CM). RAW264.7 macrophages were incubated for 16 hours in serum-free DMEM supplemented with from 0% (control) to 80% adipocyte-CM ( $n = 3$ ). Macrophage MMP9 mRNA was measured by qPCR using 36B4 as the reference gene. \* $p < 0.05$  vs. control by ANOVA with Tukey test. (b) Effects of anti-ANGPTL2 antibody on the induction of MMP9 mRNA by the adipocyte-CM. RAW264.7 macrophages were incubated for 16 hours in serum-free DMEM supplemented with 80% adipocyte-CM, in the presence of varying concentrations (1 – 10 µg/mL) of anti-ANGPTL2 antibody ( $n = 1$ ).
